# Supplementary material for: Kinesin-1 interacts with Bucky ball to form germ cells and is required to pattern the zebrafish body axis
Source: Oxford University Press journal article supplement (doi:10.1242/dev.124586), 2015-01-01
Supplement: dev124586supp.pdf [file dev124586supp.pdf]

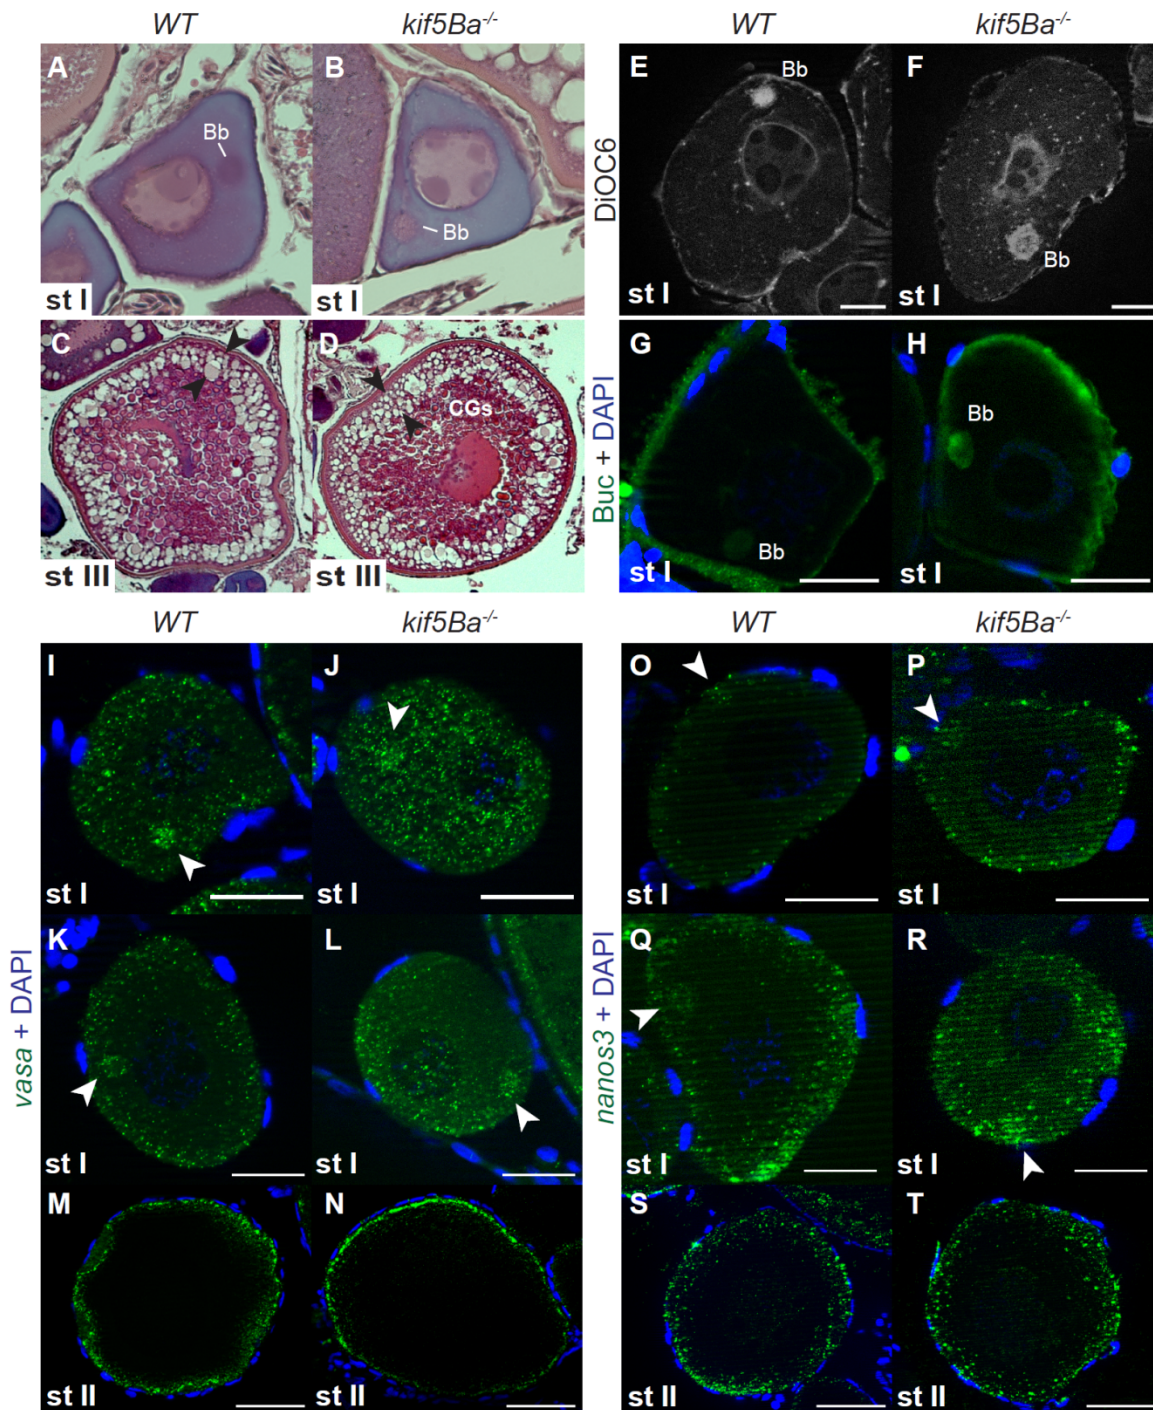

**Figure S1. *kif5Ba* is dispensable for oocyte polarity and germ plasm localization.**

(A-D) H&E staining of WT (A,C) and *kif5Ba*<sup>-/-</sup> mutant (B,D) oocytes showing polarized stage I (st I) oocytes with Balbiani bodies (Bb) and normal stage III (st III) oocytes with cortically-localized cortical granules (CGs, between arrowheads) and centrally localized

nucleus and yolk. (n=3 mutant ovaries analyzed, one each of *kif5Ba*<sup>ae11/ae11</sup>, *kif5Ba*<sup>ae11/ae12</sup>, and *kif5Ba*<sup>ae12/ae12</sup>; assayed 5-10 oocytes for each genotype).

**(E-F)** DiOC6 staining reveals that ER and mitochondria are properly localized to the Bb in WT (E) and *kif5Ba*<sup>-/-</sup> mutant (F) st I oocytes. (n=18 oocytes analyzed from *kif5Ba*<sup>ae11/ae11</sup> mutant ovary, n=19 oocytes analyzed from WT ovary). Scale bars 20µm.

**(G-H)** Buc is properly localized to the Bb in WT (G) and *kif5Ba*<sup>-/-</sup> mutant (H) st I oocytes. (n=12 oocytes analyzed from *kif5Ba*<sup>ae11/ae11</sup> mutant ovary, n=10 oocytes analyzed from WT ovary)). Scale bars 20µm.

**(I-T)** *vasa* (I-N) and *nanos3* (O-T) RNA are enriched in the Bb (arrowheads) in early st I (I,J,O,P) and late st I (K,L,Q,R) oocytes in WT (I,K,O,Q) and *kif5Ba*<sup>-/-</sup> mutants (J,L,P,R). *vasa* RNA localizes to the cortex in WT (M) and *kif5Ba*<sup>-/-</sup> mutant (N) st II oocytes.

*nanos3* RNA is diffuse throughout the cytosol of WT (S) and *kif5Ba*<sup>-/-</sup> mutant (T) st II oocytes. (n=3 WT and *kif5Ba*<sup>ae12/ae12</sup> mutant ovaries, assayed ≥10 oocytes for each condition). Scale bars 25µm (I-L, O-R), 25µm (M,N,S,T).

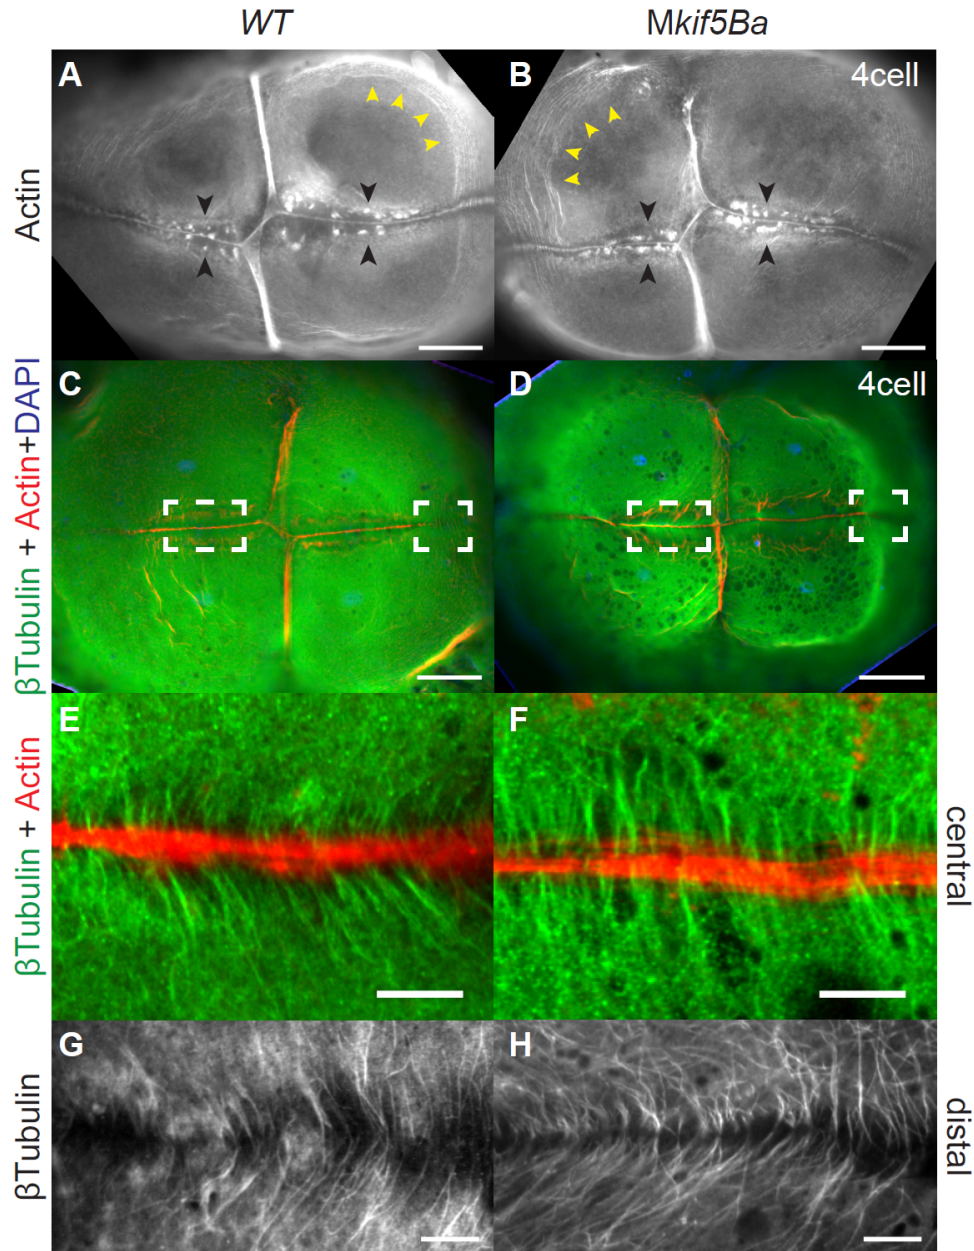

**Figure S2. Cleavage furrow-associated cytoskeleton is intact in *Mkif5Ba* mutants.**

**(A-B)** Rhodamine-phalloidin staining to label F-actin. Animal pole views reveal an F-actin contractile band present in all four furrows, F-actin accumulations flanking the FMA (black arrowheads) and circumferential actin bands around the blastomeres (yellow arrowheads) in both WT (A) and *Mkif5Ba* mutants (B). Scale bars, 100µm.

**(C-D)**  $\beta$ -Tubulin antibody staining to reveal microtubules. Animal pole views show the F-actin contractile band present in all four furrows and the furrow microtubule arrays that flank the newly forming furrows of WT (C) and *Mkif5Ba* mutants (D). Left and right dotted boxes in each panel indicate central and distal regions of the newly forming furrow respectively. Scale bars, 100 $\mu$ m.

**(E-F)** Higher magnification of the central furrow shows that the furrow microtubules are parallel to each other and perpendicular to the F-actin contractile band in both WT (E) and *Mkif5Ba* mutants (F). Scale bars, 10 $\mu$ m.

**(G-H)** Higher magnification of the distal furrow shows microtubules angled in a V-shaped configuration pointing towards the distal end in both WT (G) and *Mkif5Ba* mutants (H). Scale bars, 10 $\mu$ m. (All results are from n=11 embryos for *Mkif5Ba*<sup>ae11/ae12</sup>, n=9 for *Mkif5Ba*<sup>ae11/ae11</sup>, and n=15 for WT).



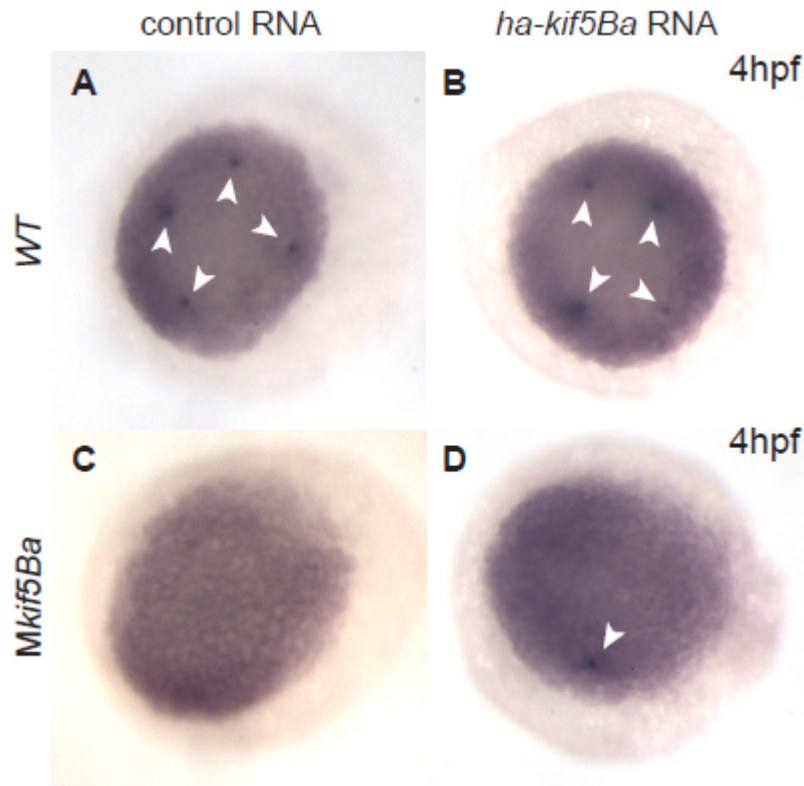

**Figure S3. Injection of control RNA has no effect on number of PGCs in WT or *Mkif5Ba* mutant embryos.**

**(A-B)** There is no difference in the number of *nanos3*-positive PGCs at 4hpf in embryos injected with either 800pg of a control RNA encoding Cherry protein (A;  $3.46 \pm 0.26$  PGCs in  $n=37$  embryos) or 800pg of *ha-kif5Ba* RNA (B;  $3.56 \pm 0.25$  PGCs in  $n=32$  embryos)

**(C-D)** While injection of 800pg of a control RNA encoding Cherry protein has no effect on the number of PGCs in *Mkif5Ba* mutants (C; zero PGCs in  $n=42/43$  embryos, one PGC in  $n=1/43$  embryos) injection of 800pg of *ha-kif5Ba* leads to the appearance of one PGC in a subset of *Mkif5Ba* mutants (D; one PGC visible in  $13/85$  embryos). Compare with uninjected *Mkif5Ba* mutants (zero PGCs in  $n=72/73$  embryos, one PGC in  $n=1/73$  embryos).

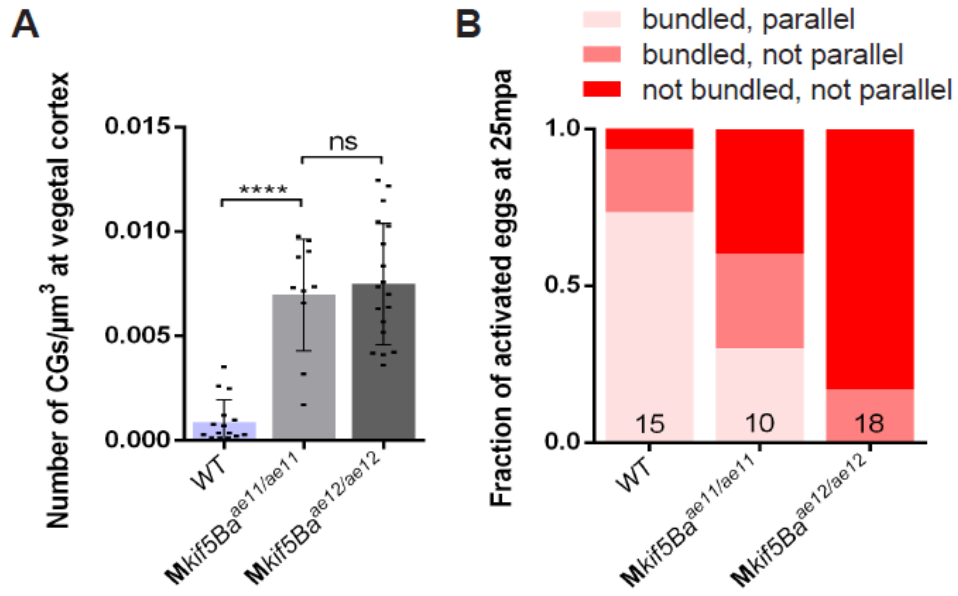

**Figure S4. Severity of vegetal microtubule defect correlates with genotype and not degree of CG retention.**

**(A)** There is no difference between the density of retained CGs at vegetal cortex at 25mpa in *Mki5Ba<sup>ae11/ae11</sup>* and *Mki5Ba<sup>ae12/ae12</sup>* mutants. Mean  $\pm$  SD. One-way ANOVA, \*\*\*\*  $p < 0.0001$ .

**(B)** The vegetal microtubules are more disorganized in *Mki5Ba<sup>ae12/ae12</sup>* compared to *Mki5Ba<sup>ae11/ae11</sup>* mutants.
